# Supplementary material for: Nrf2 Deficiency Unmasks the Significance of Nitric Oxide Synthase Activity for Cardioprotection
Source: Hindawi journal article supplement (doi:10.1155/2018/8309698), 2018-01-01
Supplement: f1 [file 8309698.f1.pdf]

|                    | WT               |              |                |                              |                                          | Nrf2 KO      |                  |                        |                     |                                 | eNOS KO                          |                |                  |                     |                                 |
|--------------------|------------------|--------------|----------------|------------------------------|------------------------------------------|--------------|------------------|------------------------|---------------------|---------------------------------|----------------------------------|----------------|------------------|---------------------|---------------------------------|
|                    | WT baseline (BL) | WT post I/R  | WT+ETU post IR | P- Value post I/R (vs WT BL) | P- Value + ETU post I/R (vs WT post I/R) | Nrf2 KO BL   | Nrf2 KO post I/R | Nrf2 KO + ETU post I/R | P-Value BL vs WT BL | P- Value post I/R vs Nrf 2KO BL | P-Value +ETU vs Nrf2 KO post I/R | eNOS KO BL     | eNOS KO post I/R | P-Value BL vs WT BL | P- Value post I/R vs eNOS KO BL |
| n                  | 9                | 9            | 7              |                              |                                          | 8            | 8                | 5                      |                     |                                 |                                  | 5              | 4                |                     |                                 |
| EF, %              | 55.73 ± 1.75     | 38.14 ± 2.8  | 36.27 ± 1.8    | < 0.0001                     | n.s.                                     | 52.98 ± 1.9  | 52.4 ± 0.6       | 39.38 ± 2.2            | n.s.                | n.s.                            | ****< 0.0001                     | 63.00 ± 3.259  | 50.34 ± 0.8      | n.s.                | *0.012                          |
| HR, bpm            | 431.5 ± 13.5     | 457.2 ± 10.9 | 441.5 ± 18.4   | n.s.                         | n.s.                                     | 409.6 ± 11.9 | 420 ± 15.1       | 442.7 ± 18             | n.s.                | n.s.                            | n.s.                             | 326.4 ± 13.01  | 358 ± 21.6       | ***0.0003           | n.s.                            |
| SV µl              | 34.50 ± 1.3      | 33.42 ± 3.7  | 30.7 ± 2.3     | n.s.                         | n.s.                                     | 38.93 ± 1.9  | 31.9. ± 2.7      | 35.27 ± 3.6            | n.s.                | 0.0475                          | n.s.                             | 42.00 ± 2.969  | 36.4. ± 2.7      | *0.0221             | n.s.                            |
| CO, µl/min         | 13.09 ± 0.9      | 14 ± 1.2     | 13.48 ± 0.9    | n.s.                         | n.s.                                     | 15.1 ± 0.7   | 13.3 ± 1         | 11.73 ± 1.2            | n.s.                | n.s.                            | n.s.                             | 13.67 ± 0.8640 | 12.9 ± 0.6       | n.s.                | n.s.                            |
| FS, %              | 10.2 ± 1.1       | 10.1 ± 1.7   | 9.08 ± 1.2     | n.s.                         | n.s.                                     | 11.04 ± 1.4  | 9.94 ± 1.6       | 7.635 ± 0.9            | n.s.                | n.s.                            | n.s.                             | 12.80 ± 1.658  | 10.1 ± 1.7       | n.s.                | n.s.                            |
| ESV, µl            | 35.31 ± 2.7      | 31.76 ± 3.3  | 36.02 ± 6.9    | n.s.                         | n.s.                                     | 50.06 ± 3.6  | 47.07 ± 10.3     | 56.26 ± 22.7           | **0.0057            | n.s.                            | n.s.                             | 27.23 ± 3.218  | 26.5 ± 2.1       | n.s.                | n.s.                            |
| EDV, µl            | 63.56 ± 10.1     | 67.2 ± 9.3   | 70.77 ± 10.5   | n.s.                         | n.s.                                     | 88.88 ± 10.1 | 78.96 ± 14.3     | 89.86 ± 27.7           | ***0.0001           | n.s.                            | n.s.                             | 69.23 ± 4.36   | 62.9 ± 3.8       | n.s.                | n.s.                            |
| LVPW;s (mm)        | 0.8831 ± 0.06    |              |                |                              |                                          | 1.047 ± 0.04 |                  |                        |                     |                                 |                                  | 1.331 ± 0.07   |                  |                     |                                 |
| <b>Mitral Flow</b> |                  |              |                |                              |                                          |              |                  |                        |                     |                                 |                                  |                |                  |                     |                                 |
| E/A                | 1.6 ± 0.3        | 2.01 ± 0.6   | 2.46 ± 0.53    | n.s.                         | n.s.                                     | 2.13 ± 0.15  | 2.43 ± 0.5       | 2.4 ± 0.8              | **0.0023            | n.s.                            | n.s.                             | 1,754 ± 0,09   | 2.43 ± 0.5       | n.s.                | n.s.                            |
| DT, ms             | 12.82 ± 0.6      | 17.36 ± 1.2  | 17.98 ± 2.7    | 0.0087                       | n.s.                                     | 24.38 ± 6.5  | 26.46 ± 7.1      | 32.06 ± 3.7            | ***0.001            | n.s.                            | n.s.                             | 21,99 ± 1,12   | 26.46 ± 7.1      | ***0.001            | n.s.                            |
| MPI                | 0.41 ± 0.1       | 0.55 ± 0.2   | 0.49 ± 0.1     | n.s.                         | n.s.                                     | 0.8 ± 0.2    | 0.78 ± 0.2       | 0.81 ± 0.2             | ***0.0005           | n.s.                            | n.s.                             | 0,5707 ± 0,025 | 0.56 ± 0.04      | n.s.                | n.s.                            |
| IVRT, ms           | 17.06 ± 1.7      | 19.45 ± 2    | 18.24 ± 3.8    | 0.0294                       | n.s.                                     | 21.92 ± 2.7  | 21.3 ± 3.3       | 26.75 ± 4.4            | ***0.0011           | n.s.                            | *0.0432                          | 16,58 ± 0,58   | 15.5 ± 1.5       | n.s.                | n.s.                            |
| IVCT, ms           | 10.23 ± 4        | 10.17 ± 3.6  | 10.83 ± 3.4    | n.s.                         | n.s.                                     | 7.81 ± 2.2   | 8 ± 2.3          | 12.7 ± 2.9             | n.s.                | n.s.                            | *0.0225                          | 8,044 ± 0,69   | 9.5 ± 0.2        | n.s.                | n.s.                            |
